# Supplementary material for: Changes in the Gut Microbiota of Urban Subjects during an Immersion in the Traditional Diet and Lifestyle of a Rainforest Village
Source: PubMed Central journal article supplement (PMC6115531; doi:10.1128/msphere.00193-18), 2018-08-29

**A. Fecal**

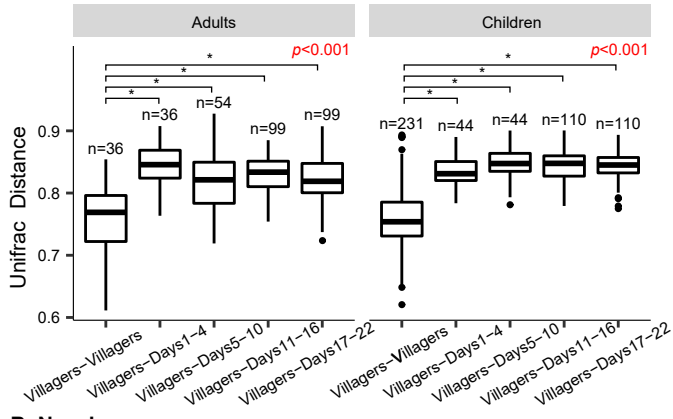

**B. Nasal**

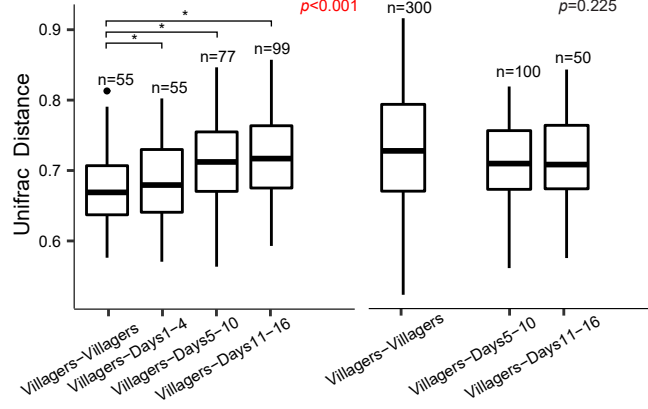

**C. Oral**

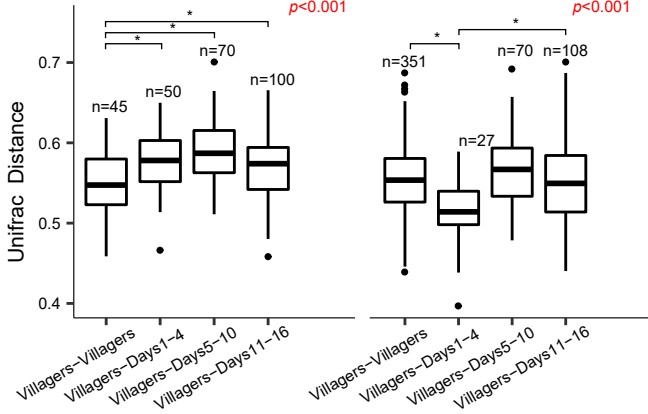

**D. Skin**

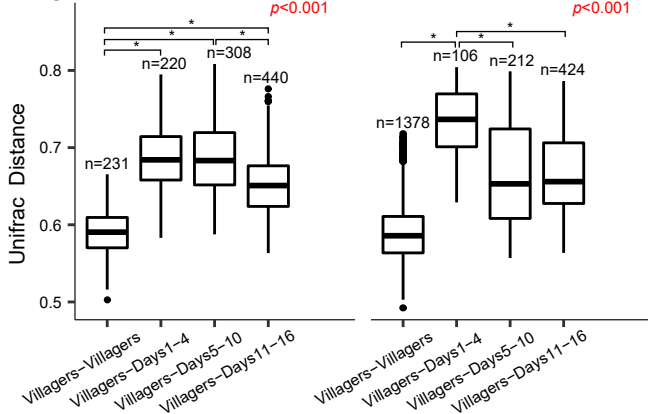

Supplement: sph004182633sf3.pdf [file sph004182633sf3.pdf]
