# Supplementary material for: Changes in the Gut Microbiota of Urban Subjects during an Immersion in the Traditional Diet and Lifestyle of a Rainforest Village
Source: PubMed Central journal article supplement (PMC6115531; doi:10.1128/msphere.00193-18), 2018-08-29
Supplement: sph004182633sf7.pdf [file sph004182633sf7.pdf]

2015 wet season

| September |    |    |    |    | October            |   |   |   |           |   |   |   |   |    |            |    |         |    |    |    |            |    |    |    |    |    |
|-----------|----|----|----|----|--------------------|---|---|---|-----------|---|---|---|---|----|------------|----|---------|----|----|----|------------|----|----|----|----|----|
|           |    |    |    |    | Days 1-4           |   |   |   | Days 5-10 |   |   |   |   |    | Days 11-16 |    |         |    |    |    | Days 17-22 |    |    |    |    |    |
| 26        | 27 | 28 | 29 | 30 | 1                  | 2 | 3 | 4 | 5         | 6 | 7 | 8 | 9 | 10 | 11         | 12 | 13      | 14 | 15 | 16 | 17         | 18 | 19 | 20 | 21 | 22 |
| Caracas   |    |    |    |    | Kanarakuni village |   |   |   |           |   |   |   |   |    |            |    | Caracas |    |    |    |            |    |    |    |    |    |
