# Supplementary material for: Changes in the Gut Microbiota of Urban Subjects during an Immersion in the Traditional Diet and Lifestyle of a Rainforest Village
Source: PubMed Central journal article supplement (PMC6115531; doi:10.1128/msphere.00193-18), 2018-08-29
Supplement: sph004182633sf8.pdf [file sph004182633sf8.pdf]

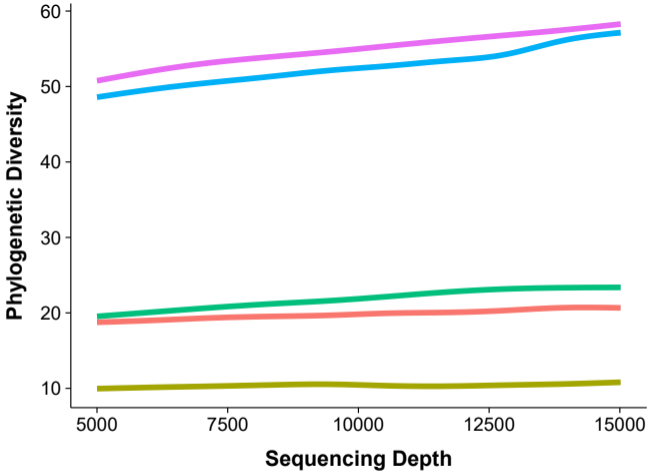

Feces Mouth Nose Right\_Arm Right\_Hand
